# Supplementary material for: Characterization of calcineurin A and B genes in the abalone, Haliotis diversicolor, and their immune response role during bacterial infection
Source: PeerJ. 2020 Apr 9;8:e8868. doi: 10.7717/peerj.8868 (PMC7151749; doi:10.7717/peerj.8868)
Supplement: Supplemental Information 2 [file peerj-08-8868-s002.xlsx]

## Sheet: Sheet1
Raw data of tissue distribution
	cq (mean)		expression ratio
tissues/genes	HcCNA	HcCNB	HcCNA	HcCNB
Man1	19.78	20.62	0.0565237	0.0315766
Man2	19.26	20	0.0565237	0.033843
Man3	19.8	20.495	0.0571145	0.0352801
Gil1	20.29	20.505	0.0625	0.0538466
Gil2	21.18	21.4	0.0766803	0.0545983
Gil3	20.645	21.25	0.0793844	0.052193
Epi1	17.53	18.5	0.248273	0.126745
Epi2	17.71	18.44	0.194117	0.117034
Epi3	16.765	17.581	0.214641	0.121919
Sto1	19.205	19.206	0.0545983	0.0545605
Sto2	19.575	19.31	0.0567199	0.0681567
Sto3	18.975	19.17	0.0468762	0.0409498
Gon1	21.925	21.22	0.0782915	0.127627
Gon2	20.865	20.495	0.0899333	0.116226
Gon3	21.305	20.7409	0.0824692	0.121928
Kid1	17.075	18.99	0.0839108	0.0222508
Kid2	17.235	19.285	0.0833312	0.0201232
Kid3	17.0845	18.9	0.0833601	0.0236831
Foo1	18.15	18.81	0.135372	0.0856739
Foo2	17.72	18.28	0.0821839	0.0557455
Foo3	17.9	18.075	0.142102	0.125869
Hep1	20.38	20.79	0.0423939	0.0319066
Hep2	20.765	20.09	0.0200535	0.0320174
Hep3	21.135	21.665	0.0321286	0.0222508
Hyp1	21.23	22	0.139178	0.0816162
Hyp2	21.34	22.1	0.139661	0.0824692
Hyp3	20.935	21.76	0.140146	0.0791098
Hem1	18.715	19.12	0.00978644	0.00739108
Hem2	18.965	19.495	0.00985451	0.00682479
Hem3	18.825	19.125	0.00978644	0.00794906
