# Supplementary material for: Characterization of calcineurin A and B genes in the abalone, Haliotis diversicolor, and their immune response role during bacterial infection
Source: PeerJ. 2020 Apr 9;8:e8868. doi: 10.7717/peerj.8868 (PMC7151749; doi:10.7717/peerj.8868)
Supplement: Supplemental Information 3 [file peerj-08-8868-s003.xlsx]

## Sheet: Sheet1
Raw data of HcCNA and HcCNB gene expression after bacterial challenge
	Cq (mean)	dCq (mean)	expression ratio			Cq (mean)	dCq (mean)	expression ratio
HcCNA					HcCNB
Gil					Gil
3 hr p.i.	20.0985	4.59348	8.21918		3 hr p.i.	20.0784	4.57336	1.75926
	20.2462	4.35684				19.9047	4.01534
	20.1934	4.62547				19.9074	4.33952
6 hr p.i.	19.7937	4.15185	11.0959		6 hr p.i.	19.8023	4.16047	22.2222
	19.8179	4.2387				19.4795	3.90034
	19.658	3.91211				19.5844	3.83851
12 hr p.i.	20.6015	4.39432	9.17808		12 hr p.i.	20.2157	4.00851	20.9259
	20.4631	4.29093				20.2081	4.03591
	20.6778	4.45308				20.305	4.0803
24 hr p.i.	20.4639	4.37354	9.72603		24 hr p.i.	19.9071	3.81677	21.2963
	20.4618	4.39282				20.4751	4.40614
	20.2604	4.08664				20.0866	3.91276
36 hr p.i.	20.0306	3.98458	11.2329		36 hr p.i.	19.6924	3.64636	26.4815
	20.0233	3.93962				19.6243	3.54058
	20.0564	4.3356				19.6695	3.94867
48 hr p.i.	19.9809	3.88183	12.8767		48 hr p.i.	19.7352	3.63614	27.4074
	20.0413	3.81601				19.923	3.69769
	20.075	3.92985				19.7664	3.62124
HcCNA					HcCNB
Foo					Foo
3 hr p.i.	18.0718	4.21401	4.33333		3 hr p.i.	18.208	4.35023	6.55556
	17.9971	3.84825				18.39	4.24112
	18.1215	4.12812				18.3786	4.38524
6 hr p.i.	18.5754	4.51653	4		6 hr p.i.	19.0086	4.94975	5.33333
	18.236	4.1418				18.5175	4.42335
	18.1373	3.87957				18.8509	4.59318
12 hr p.i.	18.7688	4.32808	3.66667		12 hr p.i.	18.6085	4.1678	6.88889
	18.4643	4.22011				18.7207	4.4765
	18.746	4.30385				18.5875	4.14541
24 hr p.i.	17.8682	3.2283	6.58333		24 hr p.i.	18.6367	3.99677	9.55556
	18.4023	4.06196				17.8581	3.51776
	17.5655	3.17948				18.297	3.91098
36 hr p.i.	17.5538	3.6543	5.16667		36 hr p.i.	17.0521	3.15266	13.3333
	17.831	3.79858				17.3926	3.36024
	17.949	3.96533				17.3913	3.4076
48 hr p.i.	17.3001	1.59608	6.16667		48 hr p.i.	19.4792	3.77515	10.3333
	18.8317	3.45815				19.132	3.75847
	19.2842	3.60891				19.1705	3.49516
HcCNA					HcCNB
Hep					Hep
3 hr p.i.	25.3082	8.66377	56.25		3 hr p.i.	21.9952	5.35073	33.6667
	21.2571	4.61051				21.773	5.1264
	22.9864	5.97471				21.9065	4.89483
6 hr p.i.	22.137	5.96931	24.6875		6 hr p.i.	21.3782	5.21057	31
	21.851	5.65167				21.2399	5.04057
	21.8683	5.24909				22.0804	5.46123
12 hr p.i.	21.3876	5.22981	37.8125		12 hr p.i.	21.1034	4.94566	39
	21.4129	5.13409				21.1929	4.9141
	21.5227	5.19709				21.1727	4.84709
24 hr p.i.	21.3366	5.64186	39.0625		24 hr p.i.	20.8881	5.19341	26.6667
	21.0482	5.03502				21.4723	5.45915
	20.9487	5.2417				21.4831	5.77613
36 hr p.i.	21.3292	5.01607	36.5625		36 hr p.i.	20.6756	4.36247	29
	21.1958	5.2224				21.6679	5.69443
	21.497	5.50253				21.0345	5.04001
48 hr p.i.	21.6168	5.01701	37.5		48 hr p.i.	21.6879	5.08809	37.3333
	21.6674	5.3217				21.2924	4.94673
	21.7911	5.27064				21.3827	4.86222
HcCNA					HcCNB
Man					Man
3 hr p.i.	18.8819	5.59494	6.49123		3 hr p.i.	19.1318	5.84485	15
	18.7753	5.61418				19.3949	6.23381
	18.9707	5.48993				19.0791	5.59831
6 hr p.i.	19.2537	3.08298	29.1228		6 hr p.i.	19.5927	3.42198	73.5294
	19.2838	3.66429				20.1231	4.5036
	19.6145	3.54346				19.8257	3.75469
12 hr p.i.	19.4527	5.21323	9.82456		12 hr p.i.	19.5065	5.26705	21.7647
	19.3964	4.95043				19.7016	5.25568
	19.1556	4.82446				19.8557	5.52457
24 hr p.i.	18.4364	4.40721	13.5088		24 hr p.i.	19.5068	5.47759	20.8824
	18.3558	4.30289				19.0848	5.03183
	18.6449	4.88455				19.5358	5.77551
36 hr p.i.	19.2688	4.18943	16.3158		36 hr p.i.	19.6789	4.5996	37.0588
	19.2711	4.12286				19.4796	4.33139
	19.5088	4.42317				19.8917	4.80601
48 hr p.i.	19.4431	5.30723	8.24561		48 hr p.i.	20.2197	6.08382	15.2941
	19.4839	5.23739				20.0025	5.75599
	19.4893	5.11468				20.1157	5.74111
HcCNA					HcCNB
Hem					Hem
3 hr p.i.	21.8935	6.98272	32.1211		3 hr p.i.	22.0622	7.15137	52.3943
	22.1079	7.5197				22.0049	7.41668
	21.8729	7.34409				21.901	7.37215
6 hr p.i.	25.2246	6.90523	42.5352		6 hr p.i.	25.3762	7.05689	62.0259
	25.155	6.75362				25.4693	7.0679
	25.2502	6.92559				25.3954	7.07086
12 hr p.i.	23.2282	6.63983	49.0765		12 hr p.i.	23.4966	6.90825	68.5151
	23.3351	6.56286				23.4288	6.65655
	23.4138	6.76349				23.8691	7.2188
24 hr p.i.	22.024	6.83694	42.4173		24 hr p.i.	22.4507	7.26364	56.0196
	22.0876	6.94728				22.3806	7.2403
	22.0076	6.80969				22.3336	7.13572
36 hr p.i.	22.258	7.91683	20.583		36 hr p.i.	22.6599	8.31874	24.5543
	22.2667	7.8407				22.9117	8.48564
	22.4057	7.96506				22.8474	8.40674
48 hr p.i.	22.6395	8.26508	15.4873		48 hr p.i.	22.7082	8.33374	26.3409
	22.6671	8.31988				22.6398	8.29258
	22.7497	8.36782				22.6585	8.27658
