# Supplementary material for: Characterization of calcineurin A and B genes in the abalone, Haliotis diversicolor, and their immune response role during bacterial infection
Source: PeerJ journal article supplement (doi:10.7717/peerj.8868), 2020-04-09
Supplement: Supplementary_Fig_S1_SequenceHcCNA_and_HcCNB.pdf [file Supplementary_Fig_S1_SequenceHcCNA_and_HcCNB.pdf]

Sequence of open reading frame of *HcCNA* from *Haliotis diversicolor* (GenBank accession number MN635462)

ATGGCTACGACCGATGGTAAGCTGTCGACGACGGAGAGGGTTGTGAAAAGTGTGCCCTTTCC  
GCCCAGTCATAGGCTTACAATGAGTGAAGTGTGTTGATGCAAAGGGCAAACCAAACCAGATG  
TCCTGAAACAACATTTTCATCCTGGAAGGAAGAGTGACTGAAGATGTAGCTTTACGGATTATC  
AACGAAGGTGCTGCCTTGCTGAGGCAAGAAAAGACCATGATAGACATAGAAGCTCCCGTCAC  
AGTGTGCGGGGACATACATGGTCAATTTTATGACCTTATGAAATTATTTGAAGTGGGTGGCC  
CACCAGCAACAACACGCTACCTCTTCCTAGGAGACTATGTAGACAGAGGATATTTTAGCATA  
GAGTGTGTATTATACCTGTGGGCTTTGAAAATATTGTATCCAAACACATTTTTCTCTTACG  
AGGAAACCACGAATGTAGGCATCTAACAGAGTATTTTCACATTTAAACAAGAATGTAAAATAA  
AGTACACAGAAAGGGTATATGATGCCTGCATGGAATCCTTTGACTGTCTGCCACTAGCAGCT  
TTAATGAATCAGCAGTTTCTCTGTGTCCATGGGGGGCTTTCACCAGAAATTCACAATTTGGA  
AGATATCCGAAAGCTGGACAGATTCAAGGAGCCTCCAGCATTGTTGGTCCCATGTGTGATATAT  
TATGGTCAGATCCATTGGAAGATTTTGGAAATGAAAAGACAACAGAACATTTTCACACATAAT  
ACAGTTAGGGGTGCTCATATTTTTTACAGCTATGCAGCATGTTGTGATTTTTTTGCAACAAA  
CAACTTGTGTCAATAATCAGAGCACATGAGGCACAGGACGCTGGGTACAGAATGTATAGGA  
AAAGTCAAACAACAGGTTTTCCATCATTAATAACAATATTCTCAGCACCAAACCTATTTGGAT  
GTTTACAACAATAAAGCTGCCATACTGAAGTATGAAAACAATGTGATGAACATCAGACAGTT  
CAACTGCTCTCCGCACCCGTACTGGTTGCCAAACTTCATGGATGTGTTTCACATGGTCTCTTC  
CATTTGTAGGGGAGAAAGTGACAGAAATGCTTGTCAACATCCTCAACATATGCTCAGATGAT  
GAGCTTATGACTGAAGGAGATGATTCCCTAGAAGTGGCAGCCAGGAAGGAGGTGATCCGCAA  
CAAATCAGGGCAATTGGCAAATGGCCAGAGTCTTCACTGTTCTGAGAGAAGAGAGCGAAA  
GCGTGCTTCAACTCAAAGGTCTCACTCCAAATGGATTGTTACCTCTTGGTGC GTTGTCTGGA  
GGAAAGGATACTCTCAAAGTGCTTTGAGTGGTTTTCTCTCAACTCACAAGATCAGCGGATT  
CGAGGAGGCTAAATGCTTAGACAACTAAATGAGAGGATGCCACCTAGAAAGGATGCAGTAA  
ACCAGCAAAACAACAAGAAAAGGCAAAATATGGACTGTCCAGTGAATCACAGGTCTATTGC  
CCTTTCTATCGCAGGGGGGTGTCAATCCAGTCACTCGTCGCAGGAAGCTGGCTTCCTAA

Sequence of open reading frame of *HcCNB* from *Haliotis diversicolor* (GenBank accession number MN635463)

ATGGGAAATGAAAACAGTTTGCCAATGGAGCTTTGCTCCAACCTTGACCTGGATGAAATCAA  
GAGGCTTGAAAACGCTTCCGCAAACCTTGACTTGGACAATTCCGGATCTTTGAGCGTGGAGG  
AGTTCATGTCCCTACCAGAGTTGCAGCAAAACCCACTGGTGCAGAGAGTTATAGACATTTTT  
GACACTGATGGAAATGGGGAGGTAGATTTTAAAGAATTCATCGAAGGTATTTACAGTTCAG  
TGTTTCGTGGCGACAAGGAGTCCAAGTTAAGATTTGCATTCAAGATATACGACATGGACAAGG  
ATGGATACATCTCAAATGGAGAGTTGTTCCAAGTCCCTTAAAATGATGGTGGGCAACAACCTG  
AAGGATACACAGCTCCAGCAGATAGTGGACAAGACGATTATCCATGCAGATACCGATGGTGA  
TGGCAAATCTCATTTGAAGAATTCTGTGCTGTTGTAGGAACCTATGGATGTTTCATAAGAAAA  
TGTTGGTTGACGTATAG
